# Supplementary material for: Sit still and pay attention: Using the Wii Balance-Board to detect lapses in concentration in children during psychophysical testing
Source: Springer Nature journal article supplement (doi:10.3758/s13428-018-1045-4), 2018-05-16
Supplement: MOESM1 [file 13428_2018_1045_MOESM1_ESM.pdf]

# Supplemental Material: Sit still and pay attention: Using the Wii Balance-Board to detect lapses in concentration in children during psychophysical testing

Pete R. Jones

## 1. Smoothing parameter when computing Postural Instability ( $CoP_{MAD}$ )

Trial-by-trial estimates of Postural Instability ( $CoP_{MAD}$ ) were smoothed using a Simple Moving Average (SMA), in which the value on each trial was mean-averaged with the values from the preceding  $N$  trials. For the data presented in the main manuscript,  $N$  was fixed at 2. However, as shown in **Fig S1**, other values yielded qualitatively similar results/conclusions.

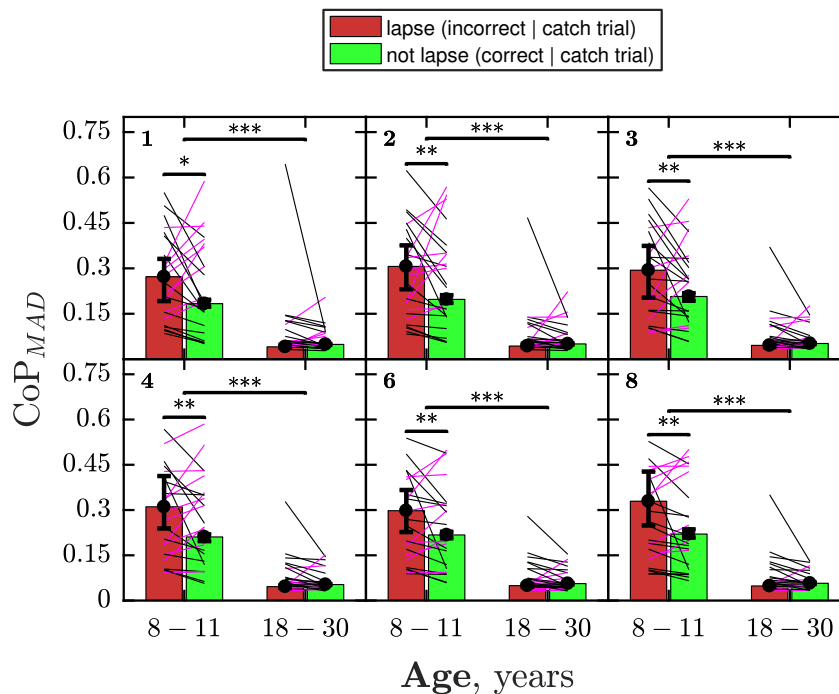

**Fig S1.** Median  $[\pm CI_{95\%}]$  Postural Instability across trials ( $CoP_{MAD}$ ), presented in the same format as Figure 3 in the main manuscript. Each panel represents a different smoothing parameter ( $N$ ), as shown in the top-left of each panel.
